# Supplementary material
Source: PubMed Central journal article supplement (PMC9195952)
Supplement: aem.00270-22-s0001.pdf [file aem.00270-22-s0001.pdf]

## SUPPLEMENTARY INFORMATION

### **A conserved biosynthetic gene cluster is regulated by quorum sensing in a shipworm symbiont**

Jose Miguel D. Robes<sup>1,2,3</sup>, Marvin A. Altamia<sup>3#</sup>, Ethan G. Murdock<sup>1,2</sup>, Gisela P. Concepcion<sup>3</sup>,  
Margo G. Haygood<sup>4</sup>, and Aaron W. Puri<sup>1,2\*</sup>

<sup>1</sup>Department of Chemistry, University of Utah, Salt Lake City, Utah, USA

<sup>2</sup>Henry Eyring Center for Cell and Genome Science, University of Utah, Salt Lake City, Utah, USA

<sup>3</sup>The Marine Science Institute, University of the Philippines Diliman, Quezon City, Philippines

<sup>4</sup>Department of Medicinal Chemistry, University of Utah, Salt Lake City, Utah, USA

#Present address:

Marvin A. Altamia, Ocean Genome Legacy Center, Department of Marine and Environmental Science, Northeastern University, Nahant, Massachusetts, USA

\*Corresponding author:

Aaron W. Puri

315 S 1400 E Rm 2020

Salt Lake City, UT 84112

USA

(801) 213-1408

a.puri@utah.edu

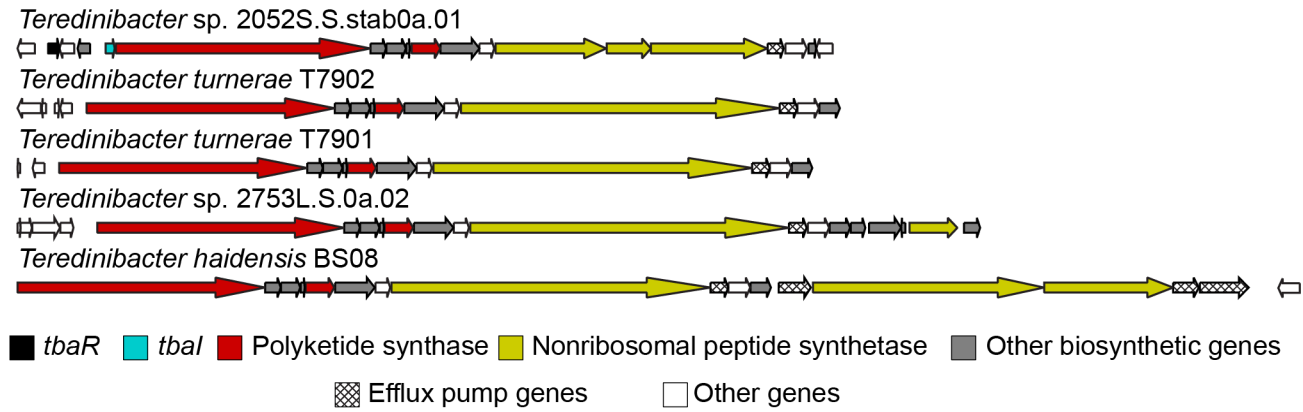

**Figure S1.** GCF\_3 is conserved in cellulolytic shipworm symbionts. Representative shipworm symbionts and their biosynthetic gene clusters belonging to GCF\_3. Amino acid identity of core biosynthetic genes is at least 65% in all cases. Genes are colored according to predicted function in antiSMASH 6.0 (1).

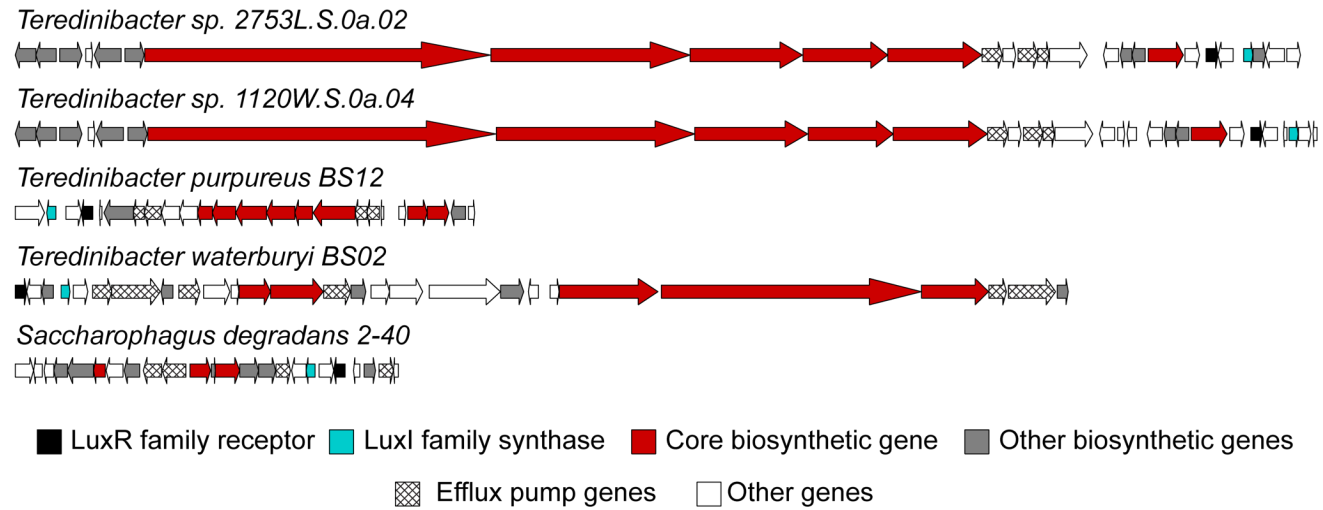

**Figure S2.** Biosynthetic gene clusters co-located with quorum sensing genes in other shipworm symbiont genomes. Genes are colored according to predicted function in antiSMASH 6.0 (1).

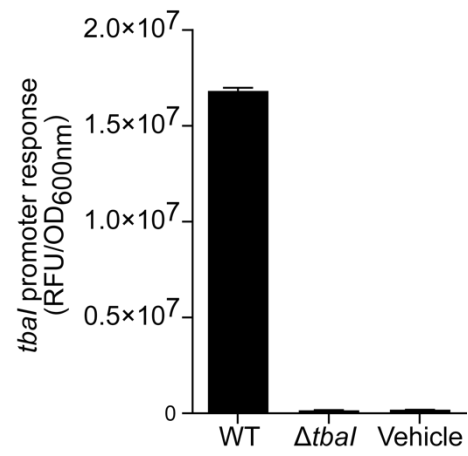

**Figure S3.** Response of  $P_{tbaI-gfp}$  *E. coli* reporter strain EAWP128 to crude supernatant extracts of the 2052S and  $\Delta tbaI$  mutant strains. Vehicle: ethyl acetate.

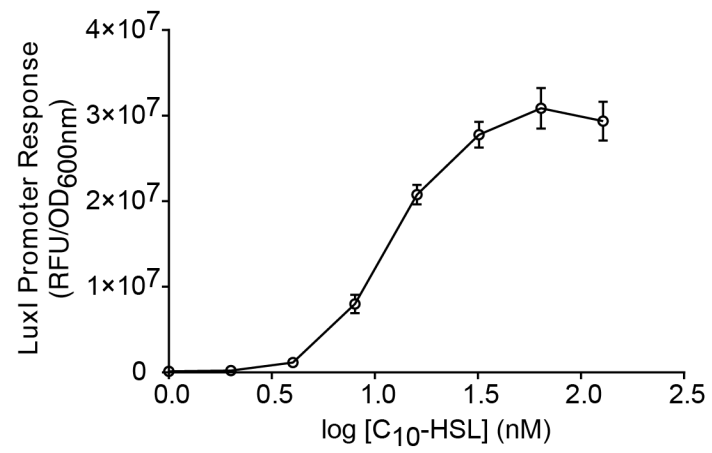

**Figure S4.** Response of  $P_{tbal-gfp}$  *E. coli* reporter strain EA WP128 to a commercial standard of C<sub>10</sub>-HSL.

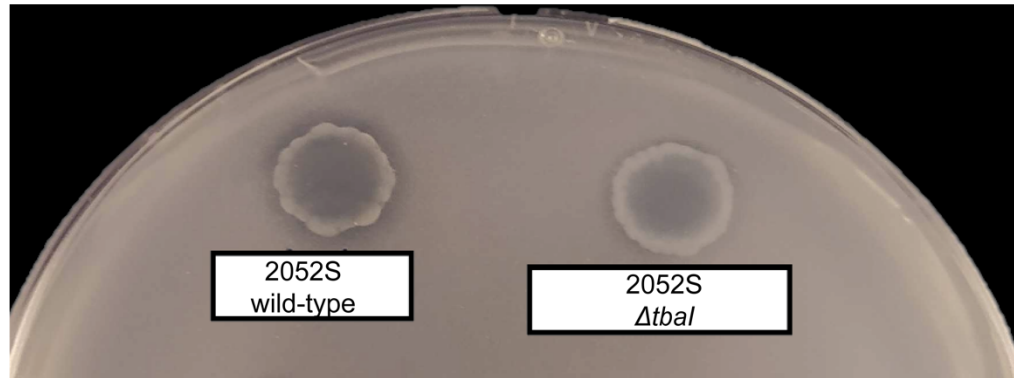

**Figure S5.** The  $\Delta tba1$  strain retains its cellulolytic ability. Small halo around the spotted colony on the shipworm basal medium (SBM) cellulose plate indicates cellulolysis.

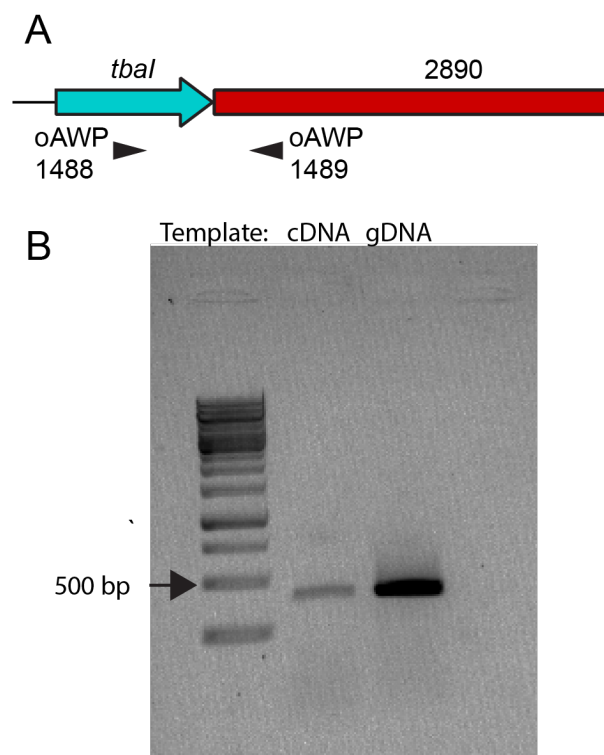

**Figure S6.** The predicted PKS gene K256DRAFT\_2890 is co-transcribed with *tbal*. (A) Locations of primers designed to span open reading frames of *tbal* and K256DRAFT\_2890. (B) Amplification of the region in A. The PCR template was either genomic DNA (gDNA) or cDNA from 2052S. Expected product size: 427 bp.

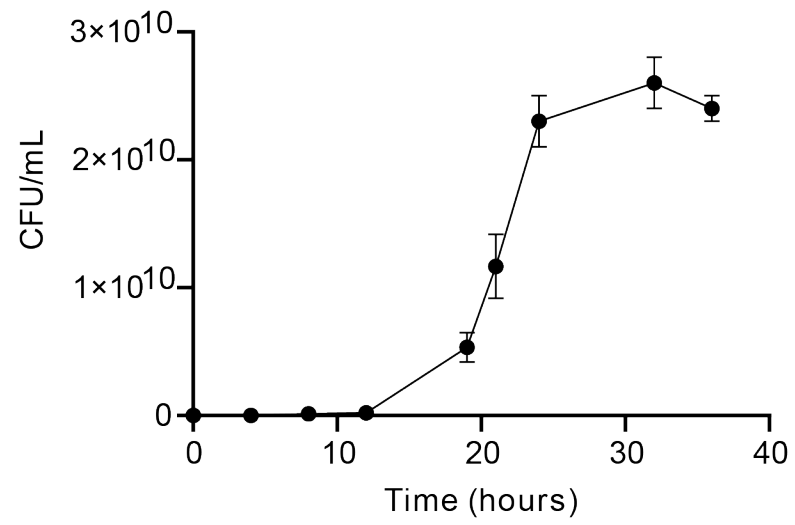

**Figure S7.** Growth curve of 2052S in SBM cellulose.



**Table S1.** Shipworm isolate strain information.

| Isolate name                                    | Metabolic type | Host shipworm                                         | Collection site                       | Sequencing center         | Estimated genome size (bp) | % GC  | IMG Genome ID | Reference |
|-------------------------------------------------|----------------|-------------------------------------------------------|---------------------------------------|---------------------------|----------------------------|-------|---------------|-----------|
| <i>Teredinibacter</i> sp. PMS-2052S.S.stab0a.01 | Cellulolytic   | PMS-1959H <i>Bactronophorus</i> cf. <i>thoracites</i> | Butuan, Agusan del Norte, Philippines | JGI-DOE                   | 5,635,926                  | 54.68 | 2541046951    | (2)       |
| <i>Teredinibacter turnerae</i> T7901            | Cellulolytic   | <i>Bankia gouldi</i>                                  | Beaufort, North Carolina, USA         | J. Craig Venter Institute | 5,193,164                  | 50.89 | 2541046951    |           |
| <i>Teredinibacter turnerae</i> T7902            | Cellulolytic   | <i>Lyrodus pedicellatus</i>                           | Long Beach, California, USA           | JGI-DOE                   | 5,387,817                  | 50.81 | 2513237099    |           |
| <i>Teredinibacter</i> sp. PMS-2753L.S.0a.02     | Cellulolytic   | PMS-2749X <i>Bactronophorus thoracites</i>            | Infanta, Quezon, Philippines          | JGI-DOE                   | 6,056,039                  | 47.96 | 2579779156    |           |
| <i>Teredinibacter haidensis</i> Bs08            | Cellulolytic   | <i>Bankia setacea</i>                                 | Puget Sound, Washington, USA          | JGI-DOE                   | 4,814,259                  | 47.18 | 2767802764    |           |
| <i>Teredinibacter</i> sp. 1120W.S.0a.04         | Cellulolytic   | PMS-1114L <i>Teredo fulleri</i>                       | Panglao, Bohol, Philippines           | JGI-DOE                   | 5,699,307                  | 50.39 | 2558309032    |           |
| <i>Teredinibacter purpureus</i> BS12            | Cellulolytic   | <i>Bankia setacea</i>                                 | Puget Sound, Washington, USA          | JGI-DOE                   | 4,921,245                  | 45.72 | 2878457929    |           |
| <i>Teredinibacter waterburyi</i> BS02           | Cellulolytic   | <i>Bankia setacea</i>                                 | Puget Sound, Washington, USA          | JGI-DOE                   | 3,886,134                  | 47.76 | 2781125611    |           |

**Table S2.** HR-MS/MS peak list for C<sub>10</sub>-HSL ([M+H]<sup>+</sup>) produced by 2052s compared to commercial standard. The 10 most intense signals are shown for each sample.

| <b>2052S</b> |           | <b>Standard</b> |           |
|--------------|-----------|-----------------|-----------|
| <i>m/z</i>   | Intensity | <i>m/z</i>      | Intensity |
| 102.0563     | 6.50E+03  | 102.0565        | 2.90E+04  |
| 256.1914     | 6.30E+03  | 256.1915        | 2.90E+04  |
| 155.1430     | 6.10E+03  | 155.1431        | 2.10E+04  |
| 238.1810     | 1.20E+03  | 238.1813        | 9.20E+03  |
| 95.0874      | 9.40E+02  | 95.0871         | 8.80E+03  |
| 81.0723      | 8.70E+02  | 81.0718         | 8.60E+03  |
| 74.0631      | 8.60E+02  | 74.0629         | 8.30E+03  |
| 228.1940     | 8.10E+02  | 156.1468        | 8.10E+03  |
| 156.1456     | 7.60E+02  | 137.1328        | 8.00E+03  |
| 137.1326     | 7.32E+02  | 228.1968        | 7.90E+03  |

## REFERENCES

1. Blin K, Shaw S, Kloosterman AM, Charlop-Powers Z, van Wezel GP, Medema MH, Weber T. 2021. antiSMASH 6.0: improving cluster detection and comparison capabilities. *Nucleic Acids Res* <https://doi.org/10.1093/nar/gkab335>
2. Altamia MA, Lin Z, Trindade-Silva AE, Uy ID, Shipway JR, Wilke DV, Concepcion GP, Distel DL, Schmidt EW, Haygood MG. 2020. Secondary Metabolism in the Gill Microbiota of Shipworms (Teredinidae) as Revealed by Comparison of Metagenomes and Nearly Complete Symbiont Genomes. *mSystems* <https://doi.org/10.1128/mSystems.00261-20>
